# Supplementary material for: 1H NMR-Based Isolation of Anti-Inflammatory 9,11-Secosteroids from the Octocoral Sinularia leptoclados
Source: MDPI journal article supplement (doi:10.3390/md18050271), 2020-05-21
Supplement: s1 [file s1]

## Supporting Material:

# **<sup>1</sup>H NMR-based isolation of anti-inflammatory 9,11-secosteroids from the octocoral *Sinularia leptoclados***

Yu-Chia Chang <sup>1</sup>, Kuei-Hung Lai <sup>1</sup>, Sunil Kumar <sup>2</sup>, Po-Jen Chen <sup>3</sup>, Yi-Hsuan Wu <sup>1</sup>,  
Ching-Long Lai <sup>1,4</sup>, Hsi-Lung Hsieh<sup>1,4,5,\*</sup>, Ping-Jyun Sung <sup>6,7,8,\*</sup>, and Tsong-Long Hwang <sup>1,2,9,10,11,\*</sup>

<sup>1</sup> Research Center for Chinese Herbal Medicine, Graduate Institute of Healthy Industry Technology, College of Human Ecology, Chang Gung University of Science and Technology, Taoyuan 333324, Taiwan; jay0404@gmail.com (Y.-C.C.); mos19880822@gmail.com (K.-H.L.); yhwu03@mail.cgust.edu.tw (Y.-H.W.); dinolai@mail.cgust.edu.tw (C.-L.L.)

<sup>2</sup> Chinese Herbal Medicine Research Team, Healthy Aging Research Center, Chang Gung University, Taoyuan 333323, Taiwan; suniliftm1982@gmail.com

<sup>3</sup> Department of Cosmetic Science, Providence University, Taichung 433303, Taiwan; [litlep@hotmail.com](mailto:litlep@hotmail.com)

<sup>4</sup> Department of Nursing, Division of Basic Medical Sciences, Chang Gung University of Science and Technology, Taoyuan 333324, Taiwan

<sup>5</sup> Department of Neurology, Chang Gung Memorial Hospital, Taoyuan 333423, Taiwan

<sup>6</sup> National Museum of Marine Biology and Aquarium, Pingtung 944401, Taiwan

<sup>7</sup> Graduate Institute of Marine Biology, National Dong Hwa University, Pingtung 944401, Taiwan

<sup>8</sup> Chinese Medicine Research and Development Center, China Medical University Hospital, Taichung 404394, Taiwan

<sup>9</sup> Graduate Institute of Natural Products, College of Medicine, Chang Gung University, Taoyuan 333323, Taiwan

<sup>10</sup> Department of Anaesthesiology, Chang Gung Memorial Hospital, Taoyuan 333423, Taiwan

<sup>11</sup> Department of Chemical Engineering, Ming Chi University of Technology, New Taipei City 243303, Taiwan

\* Correspondence: hlhsieh@mail.cgust.edu.tw (H.-L.H.); pjsung@nmmba.gov.tw (P.-J.S.); htl@mail.cgu.edu.tw (T.-L.H.); Tel.: +886-3-211-8999 (ext. 5421) (H.-L.H.); +886-8-882-5037 (P.-J.S.); +886-3-211-8800 (T.-L.H.); Fax: +886-8-882-5087 (P.-J.S.); +886-3-211-8506 (T.-L.H.)

| <b>No</b>          | <b>Content</b>                                                                                   | <b>page</b> |
|--------------------|--------------------------------------------------------------------------------------------------|-------------|
| <b>Figure S1.</b>  | HRESIMS spectrum of compound <b>1</b>                                                            | 3           |
| <b>Figure S2.</b>  | IR spectrum of compound <b>1</b>                                                                 | 3           |
| <b>Figure S3.</b>  | <sup>1</sup> H NMR spectrum (400 MHz) of compound <b>1</b> in CDCl <sub>3</sub>                  | 4           |
| <b>Figure S4.</b>  | <sup>13</sup> C NMR spectrum (100 MHz) of compound <b>1</b> in CDCl <sub>3</sub>                 | 4           |
| <b>Figure S5.</b>  | DEPT spectrum of compound <b>1</b> in CDCl <sub>3</sub>                                          | 5           |
| <b>Figure S6.</b>  | gHSQC spectrum (400 MHz) of compound <b>1</b> in CDCl <sub>3</sub>                               | 5           |
| <b>Figure S7.</b>  | <sup>1</sup> H- <sup>1</sup> H COSY spectrum (400 MHz) of compound <b>1</b> in CDCl <sub>3</sub> | 6           |
| <b>Figure S8.</b>  | gHMBC spectrum (400 MHz) of compound <b>1</b> in CDCl <sub>3</sub>                               | 6           |
| <b>Figure S9.</b>  | NOESY spectrum (400 MHz) of compound <b>1</b> in CDCl <sub>3</sub>                               | 7           |
| <b>Figure S10.</b> | HRESIMS spectrum of compound <b>2</b>                                                            | 7           |
| <b>Figure S11.</b> | IR spectrum of compound <b>2</b>                                                                 | 8           |
| <b>Figure S12.</b> | <sup>1</sup> H NMR spectrum (400 MHz) of compound <b>2</b> in CDCl <sub>3</sub>                  | 8           |
| <b>Figure S13.</b> | <sup>13</sup> C NMR spectrum (100 MHz) of compound <b>2</b> in CDCl <sub>3</sub>                 | 9           |
| <b>Figure S14.</b> | DEPT spectrum of compound <b>1</b> in CDCl <sub>3</sub> .                                        | 9           |
| <b>Figure S15.</b> | gHSQC spectrum (400 MHz) of compound <b>2</b> in CDCl <sub>3</sub>                               | 10          |
| <b>Figure S16.</b> | <sup>1</sup> H- <sup>1</sup> H COSY spectrum (400 MHz) of compound <b>2</b> in CDCl <sub>3</sub> | 10          |
| <b>Figure S17.</b> | gHMBC spectrum (400 MHz) of compound <b>2</b> in CDCl <sub>3</sub>                               | 11          |
| <b>Figure S18.</b> | NOESY spectrum (400 MHz) of compound <b>2</b> in CDCl <sub>3</sub>                               | 11          |
| <b>Figure S19.</b> | <sup>1</sup> H NMR spectrum (400 MHz) of compound <b>3</b> in CDCl <sub>3</sub>                  | 12          |
| <b>Figure S20.</b> | <sup>13</sup> C NMR spectrum (100 MHz) of compound <b>3</b> in CDCl <sub>3</sub>                 | 12          |
| <b>Figure S21.</b> | <sup>1</sup> H NMR spectrum (400 MHz) of compound <b>4</b> in CDCl <sub>3</sub>                  | 13          |
| <b>Figure S22.</b> | <sup>13</sup> C NMR spectrum (100 MHz) of compound <b>4</b> in CDCl <sub>3</sub>                 | 13          |

## Mass Spectrum SmartFormula Report

### Analysis Info

Analysis Name D:\Data\2\CGUSTCOO4P3C\_000003.d  
Method broadband first signal  
Sample Name Cgust-c004p3c  
Comment ESI Positive

5/28/2019 4:52:36 PM  
Operator: YU HSIAO-CHING  
Instrument: BRUKER FT-MS solarix

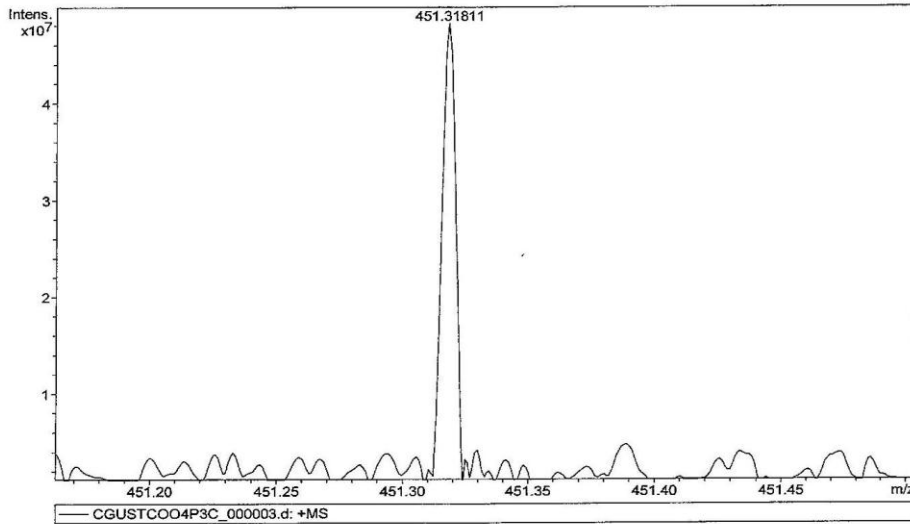

| Meas. m/z | # | Formula                                          | Score  | m/z       | err [mDa] | err [ppm] | mSigma | rdb | e <sup>-</sup> Conf | N-Rule |
|-----------|---|--------------------------------------------------|--------|-----------|-----------|-----------|--------|-----|---------------------|--------|
| 451.31811 | 1 | C <sub>28</sub> H <sub>44</sub> NaO <sub>3</sub> | 100.00 | 451.31827 | 0.15      | 0.34      | 27.3   | 6.5 | even                | ok     |

### S1. HRESIMS spectrum of compound 1

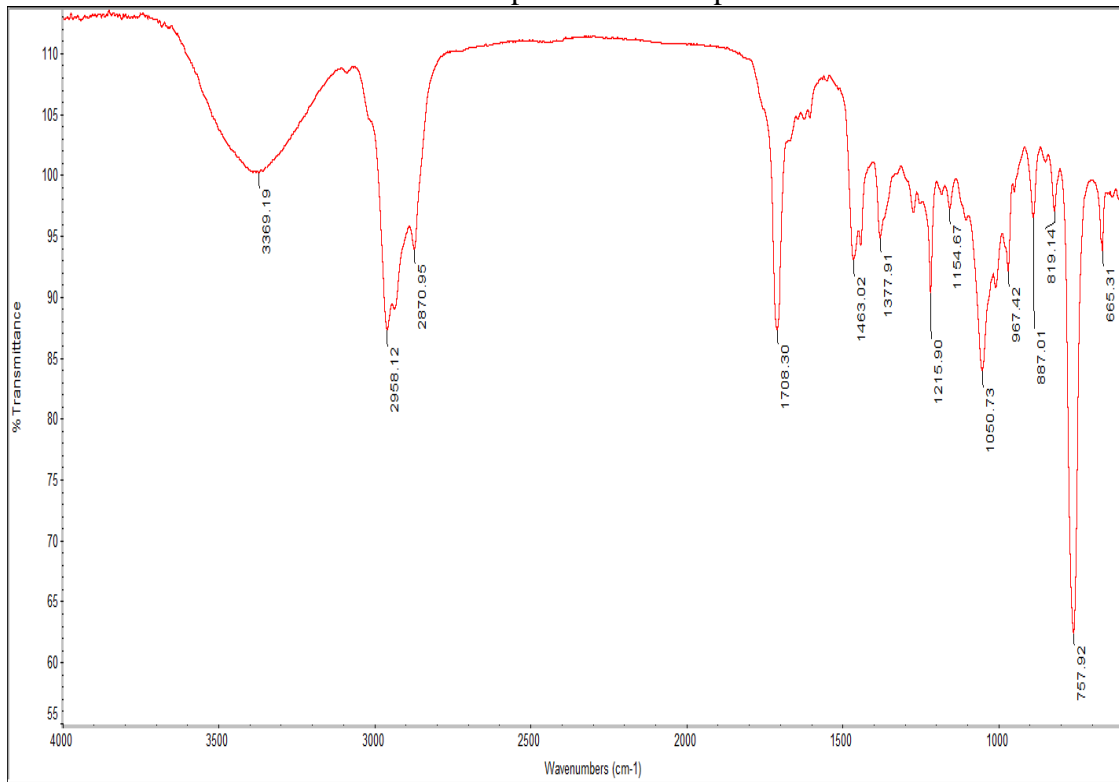

### S2. IR spectrum of compound 1

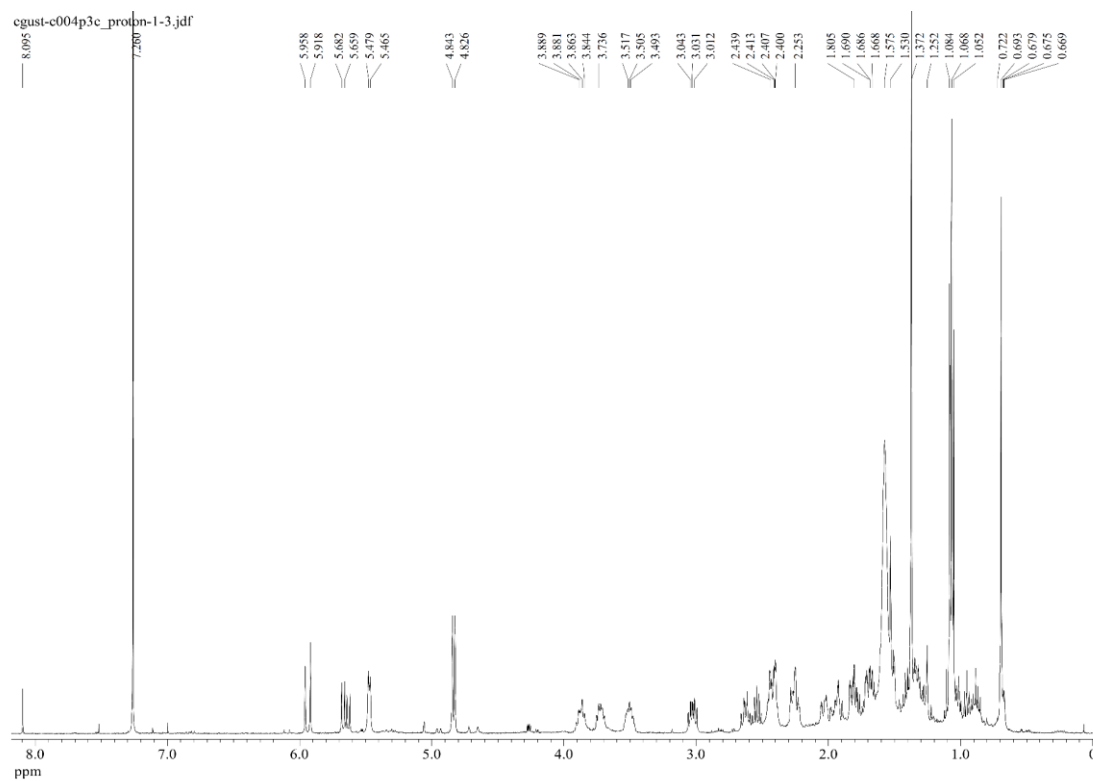

S3.  $^1\text{H}$  NMR spectrum (400 MHz) of compound **1** in  $\text{CDCl}_3$

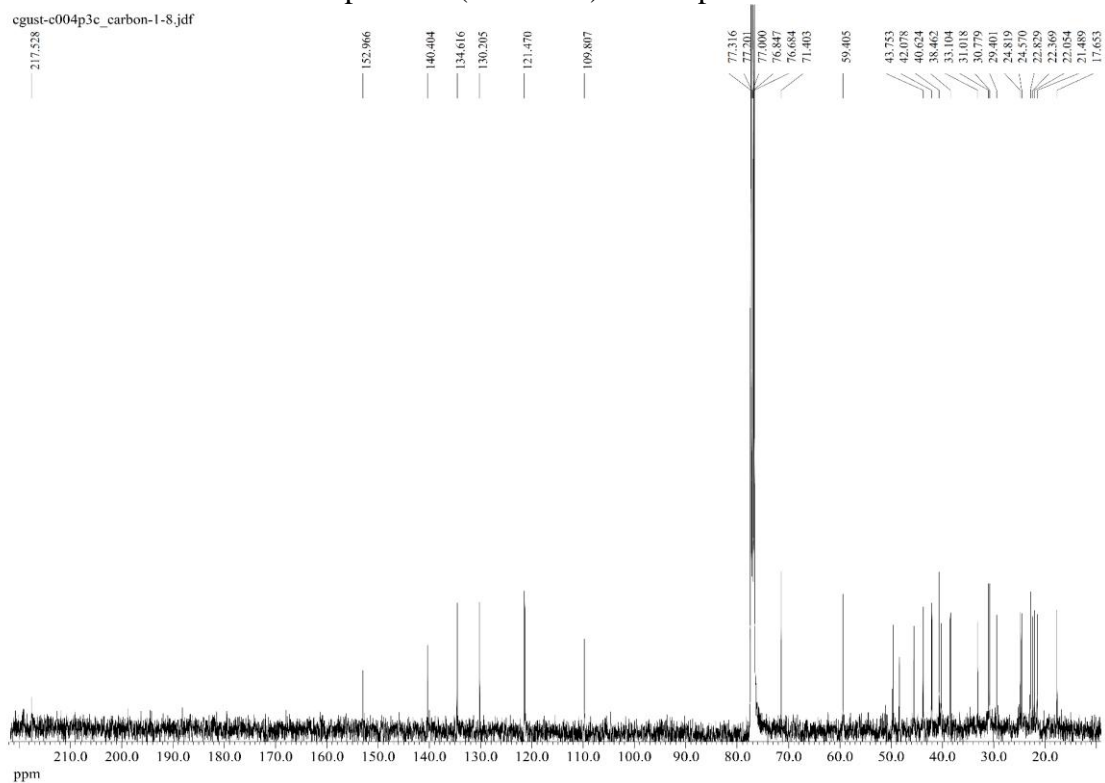

S4.  $^{13}\text{C}$  NMR spectrum (100 MHz) of compound **1** in  $\text{CDCl}_3$

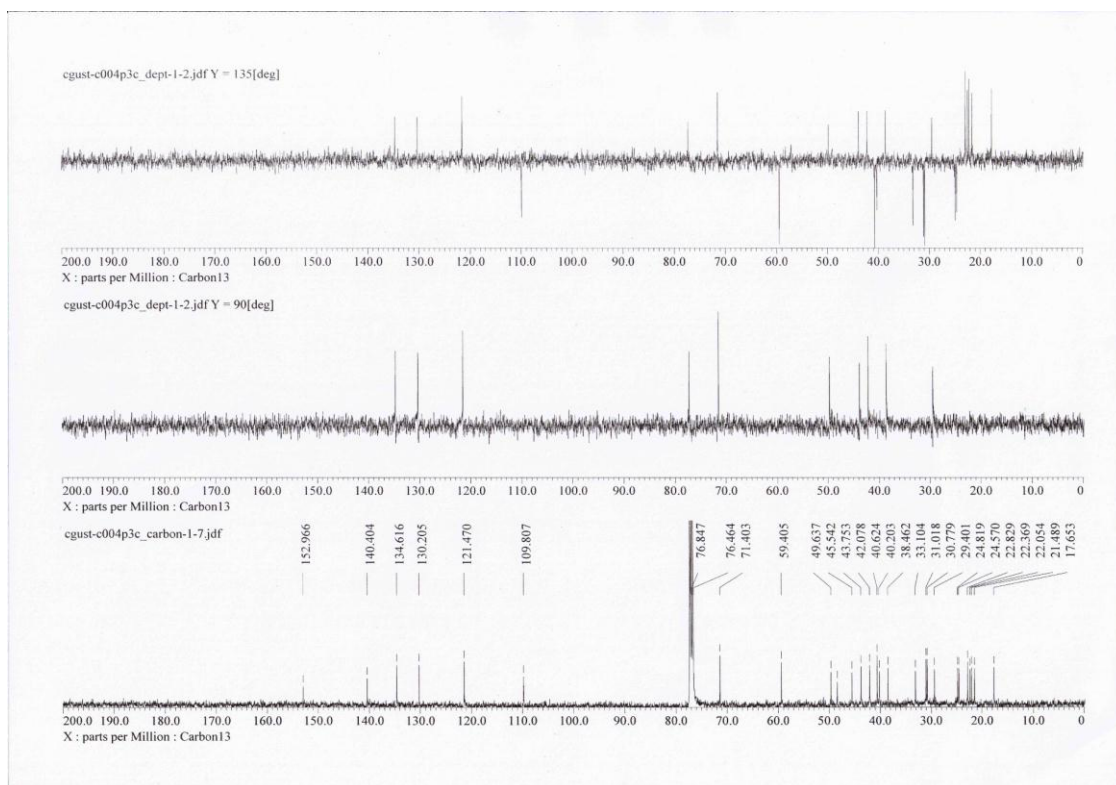

S5. DEPT spectrum of compound **1** in CDCl<sub>3</sub>

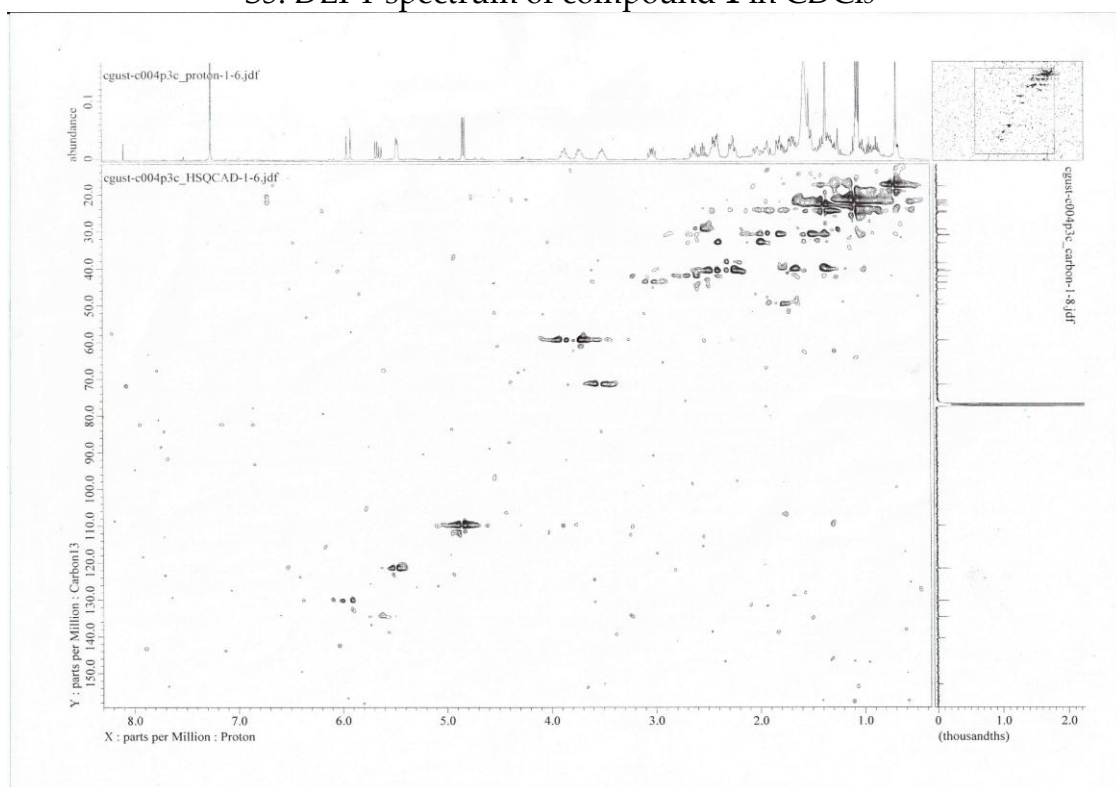

S6. gHSQC spectrum (400 MHz) of compound **1** in CDCl<sub>3</sub>

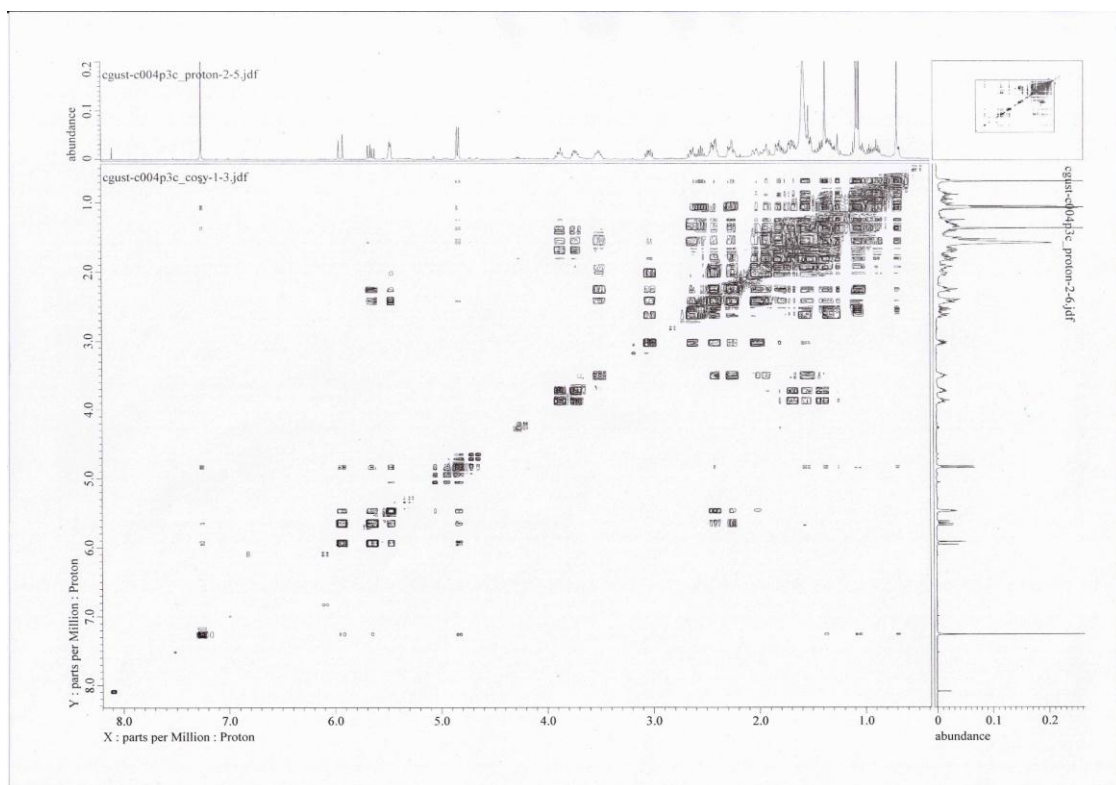

S7.  $^1\text{H}$ - $^1\text{H}$  COSY spectrum (400 MHz) of compound **1** in  $\text{CDCl}_3$

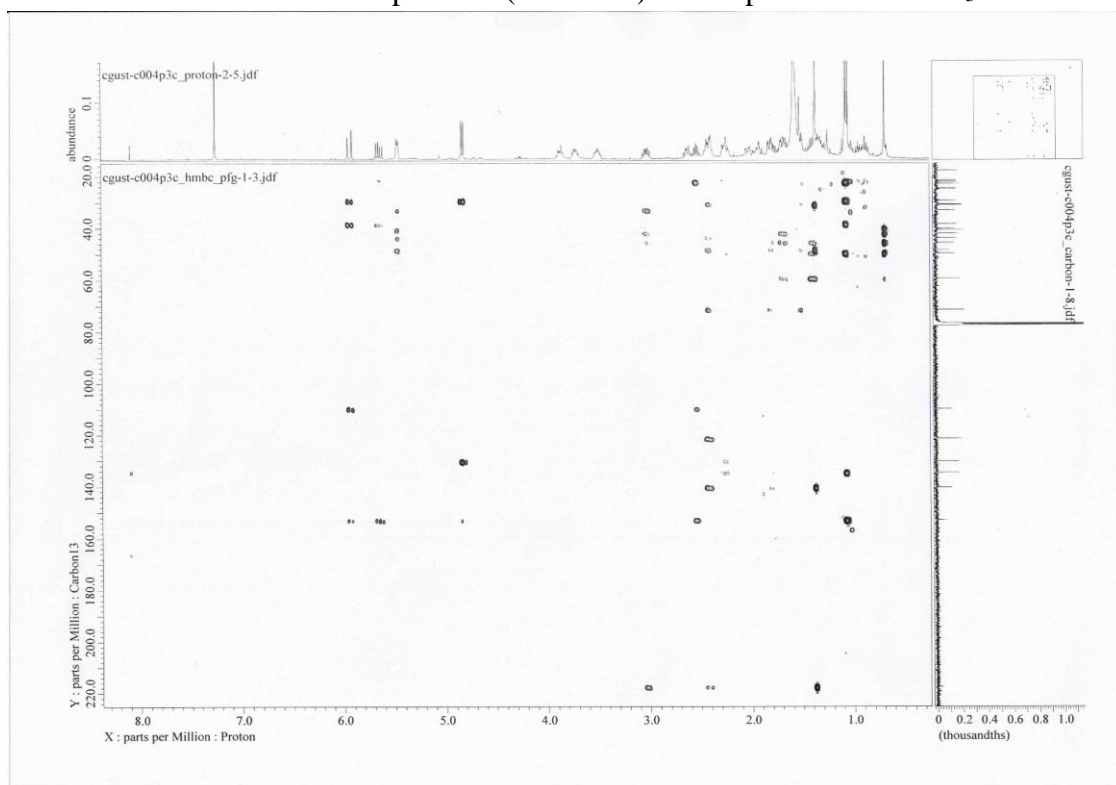

S8. gHMBC spectrum (400 MHz) of compound **1** in  $\text{CDCl}_3$

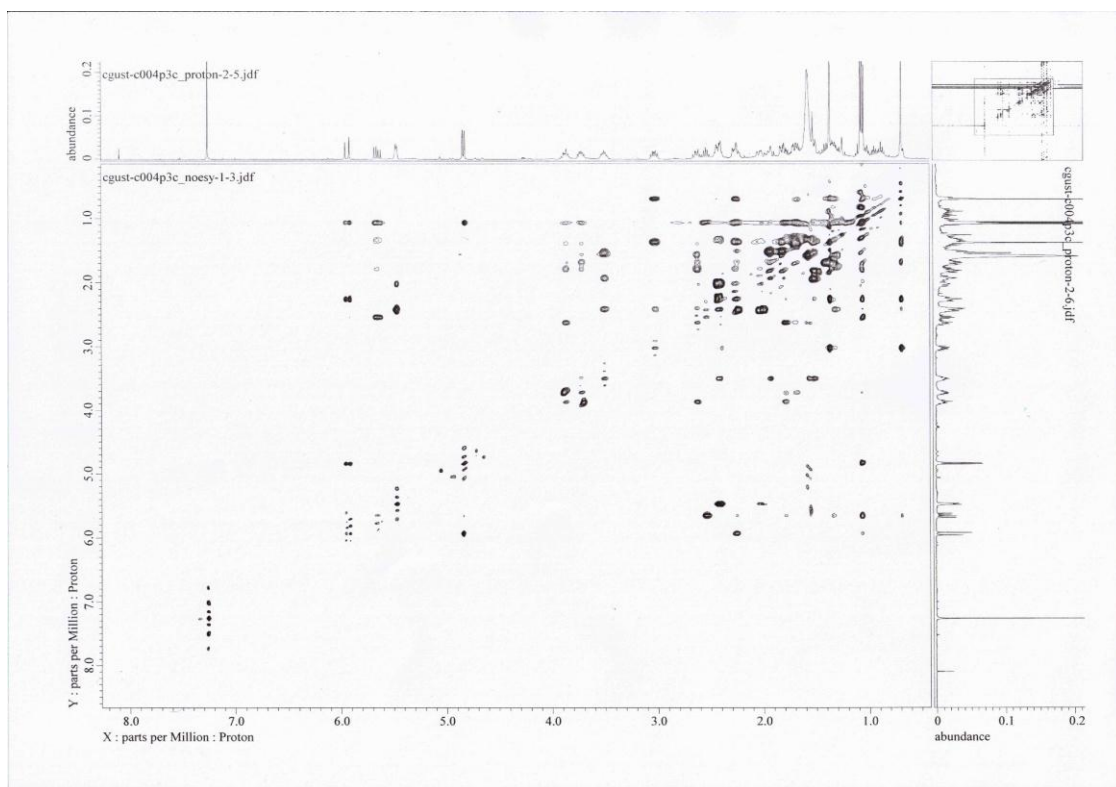

S9. NOESY spectrum (400 MHz) of compound **1** in  $\text{CDCl}_3$

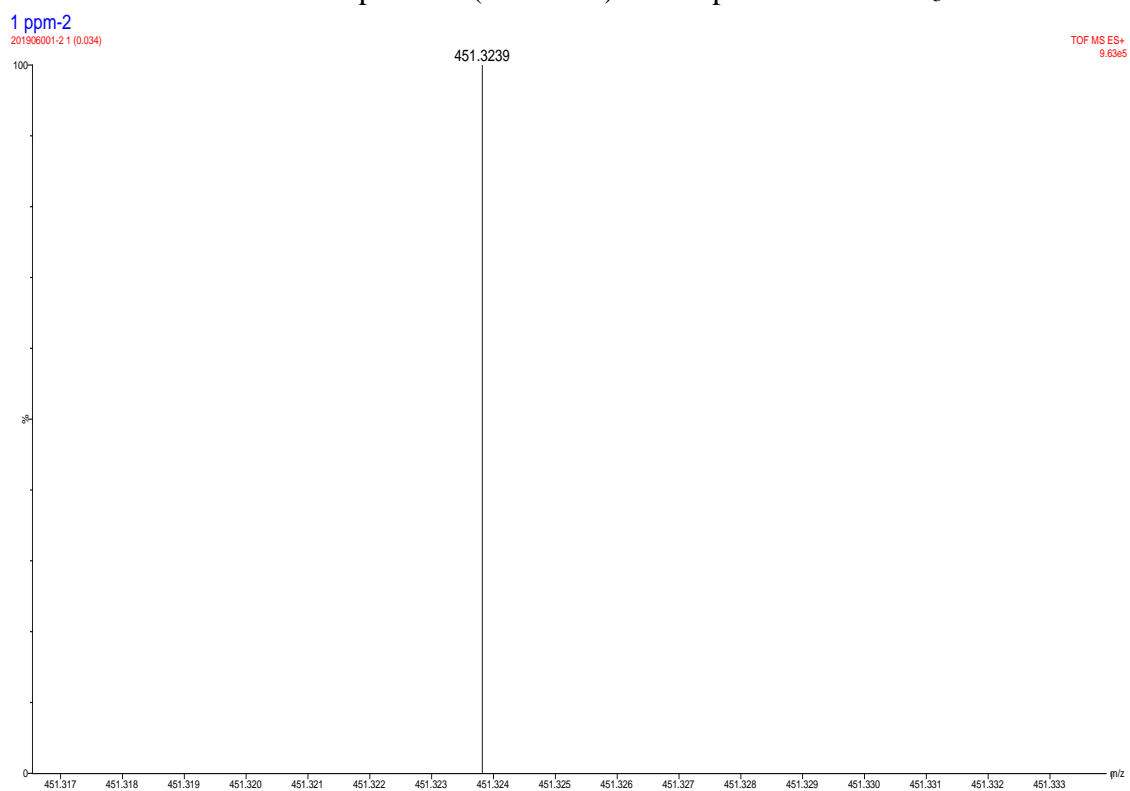

S10. HRMS spectrum of compound **2**

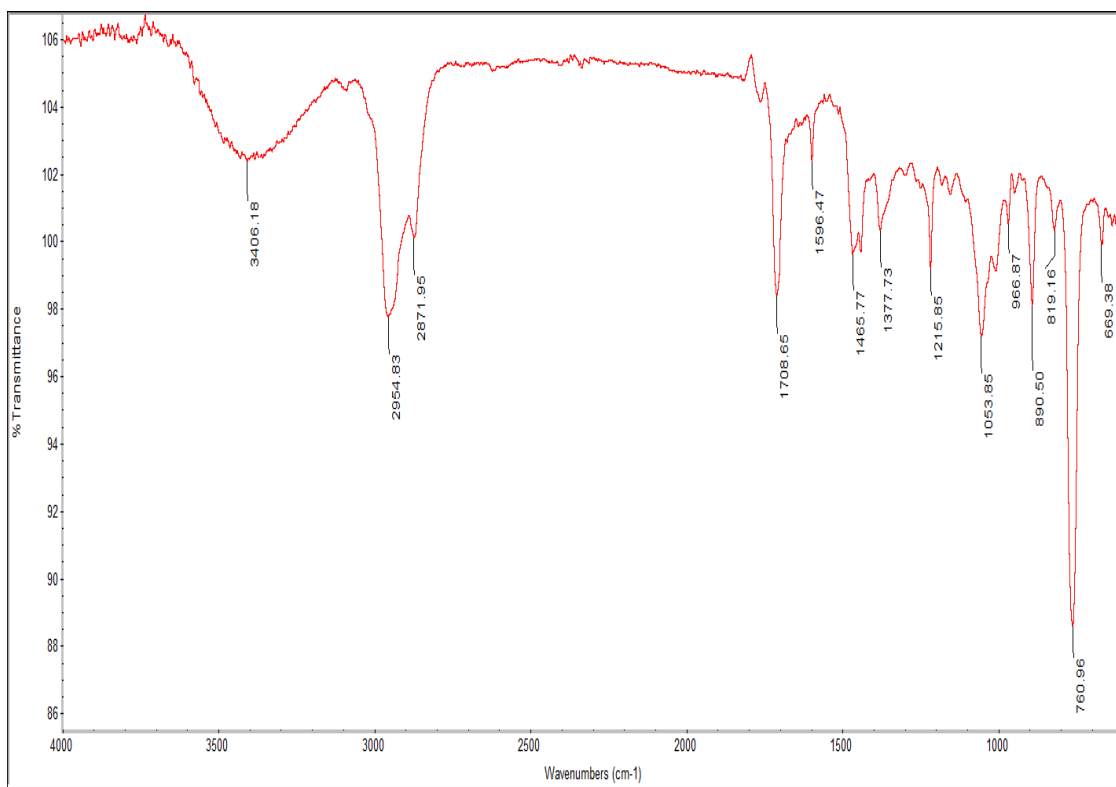

S11. IR spectrum of compound 2

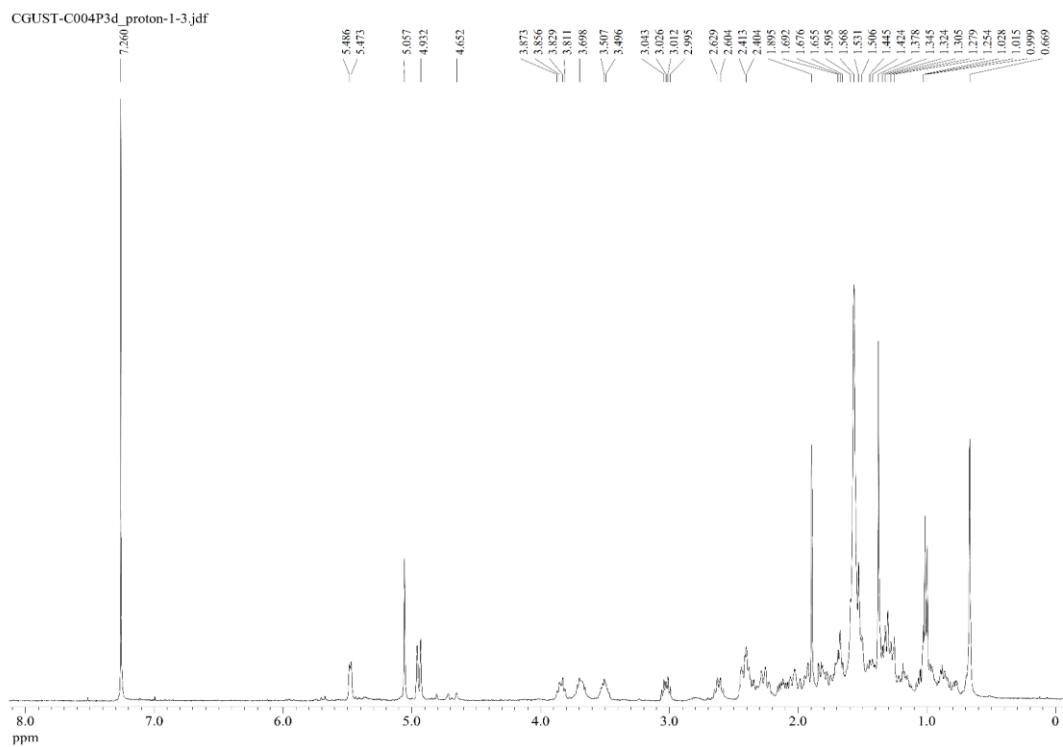

S12. <sup>1</sup>H NMR spectrum (400 MHz) of compound 2 in CDCl<sub>3</sub>



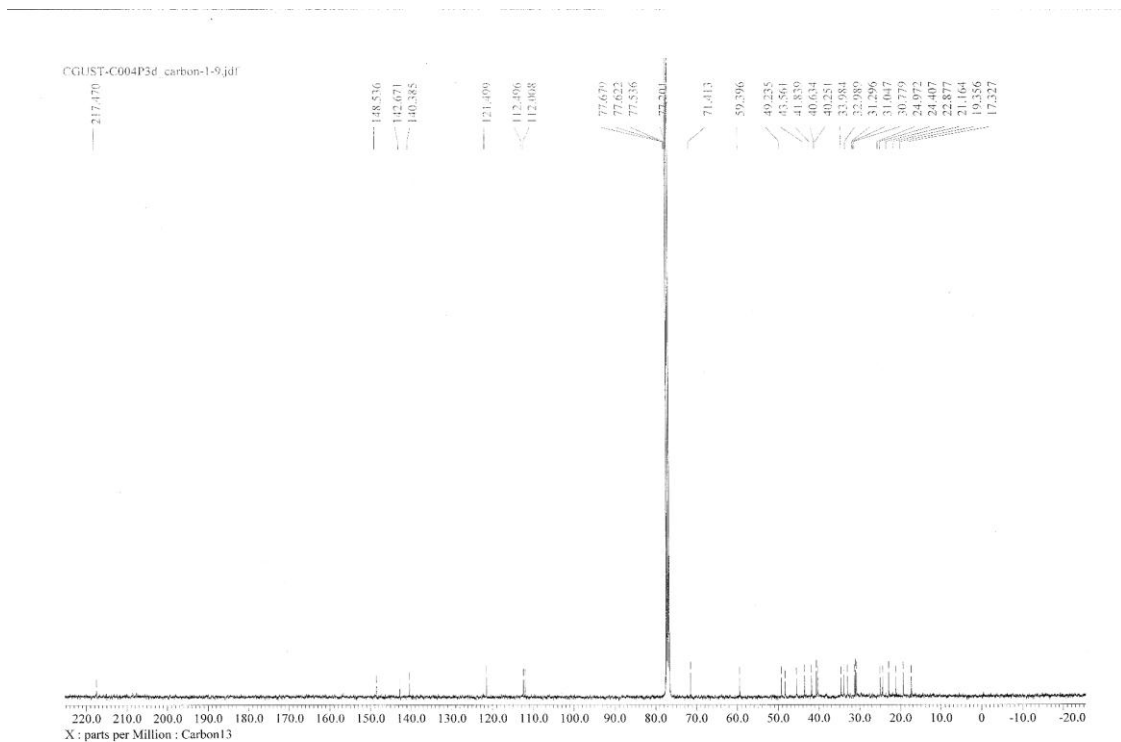

S13.  $^{13}\text{C}$  NMR spectrum (100 MHz) of compound **2** in  $\text{CDCl}_3$

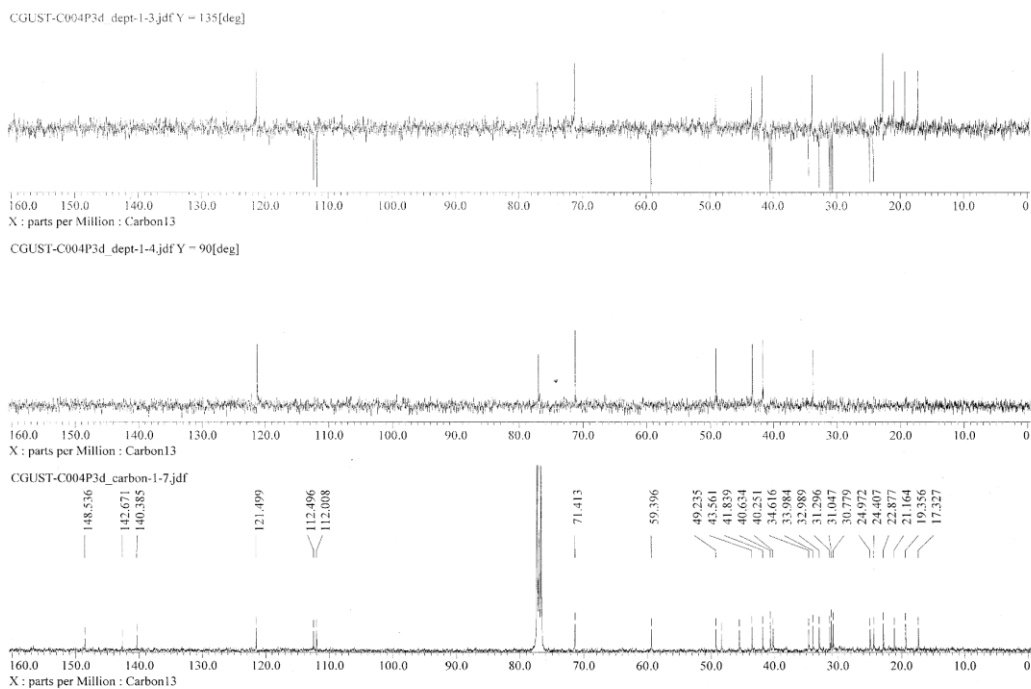

S14. DEPT spectrum of compound **2** in  $\text{CDCl}_3$ .

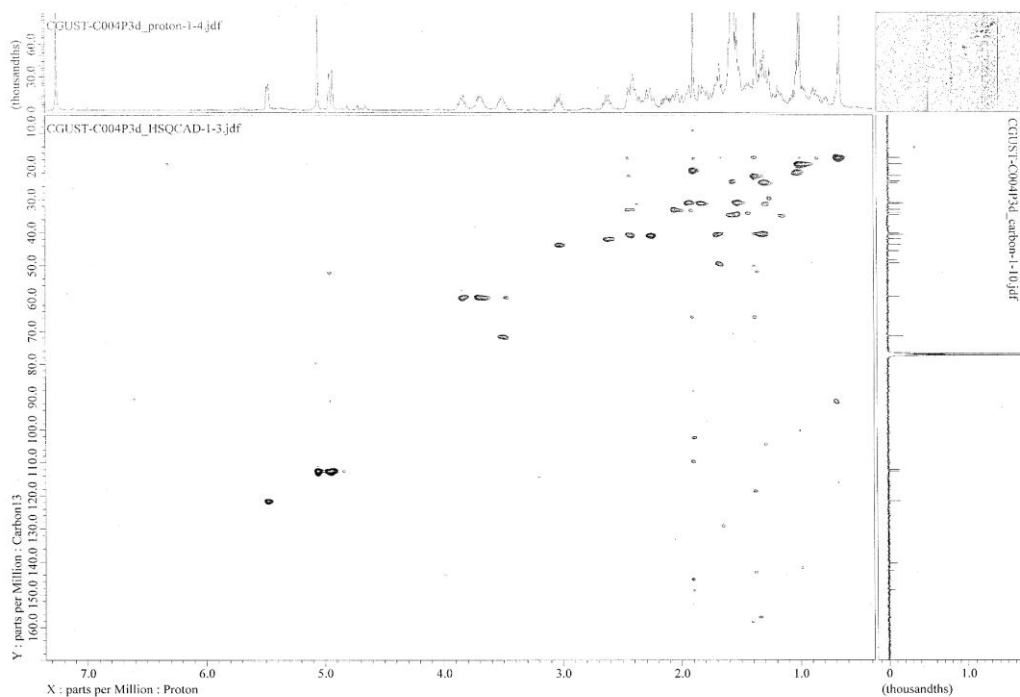

S15. gHSQC spectrum (400 MHz) of compound **2** in CDCl<sub>3</sub>

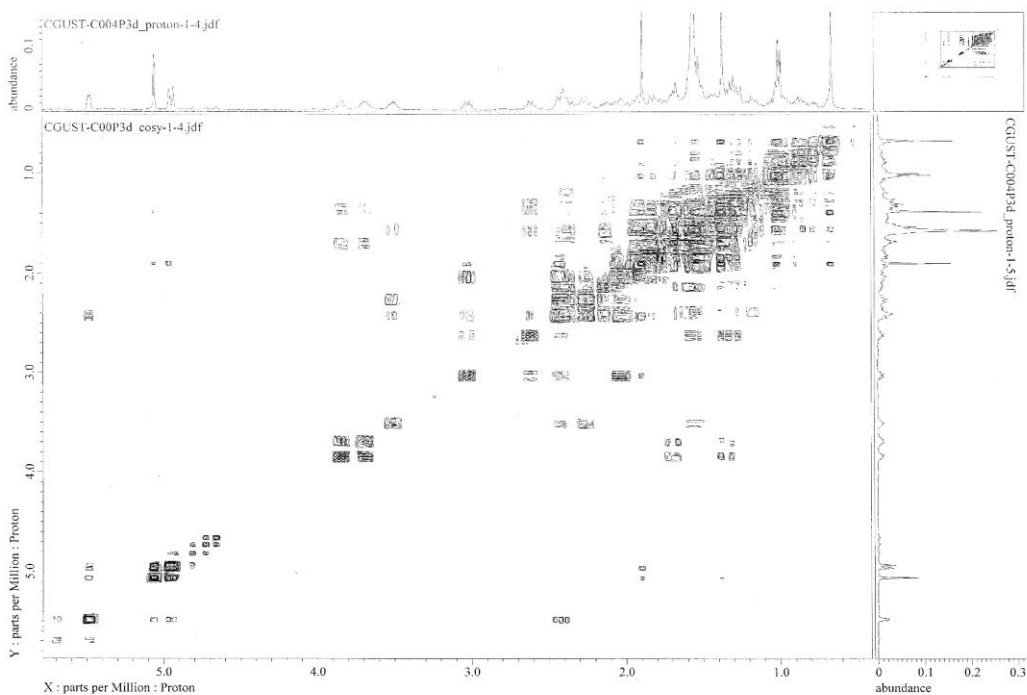

S16. <sup>1</sup>H-<sup>1</sup>H COSY spectrum (400 MHz) of compound **2** in CDCl<sub>3</sub>

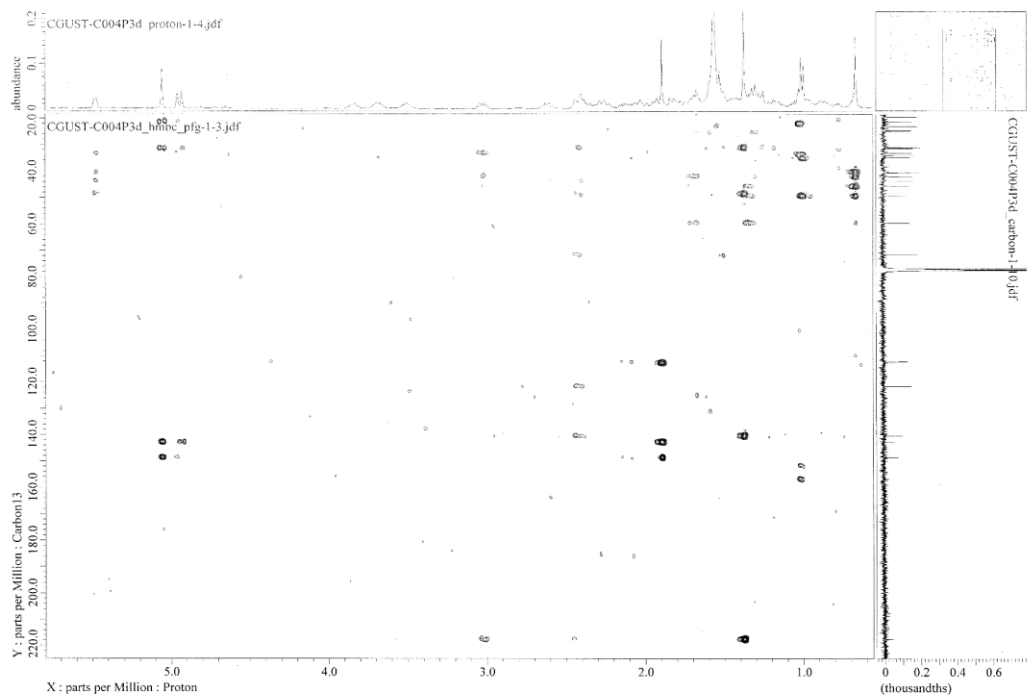

S17. gHMBC spectrum (400 MHz) of compound **2** in  $\text{CDCl}_3$

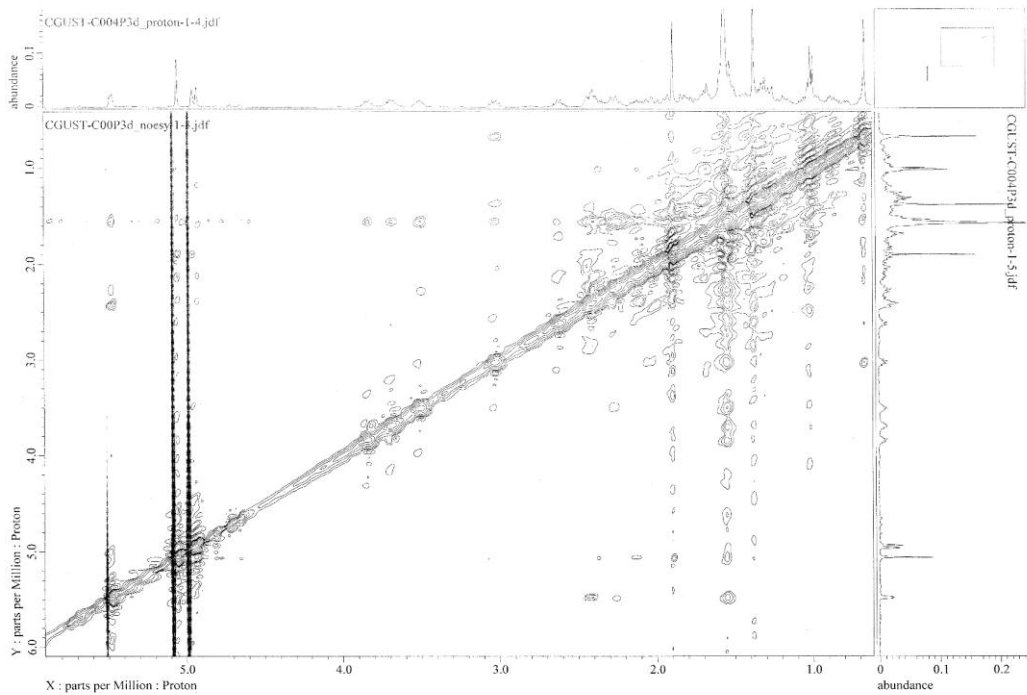

S18. NOESY spectrum (400 MHz) of compound **2** in  $\text{CDCl}_3$

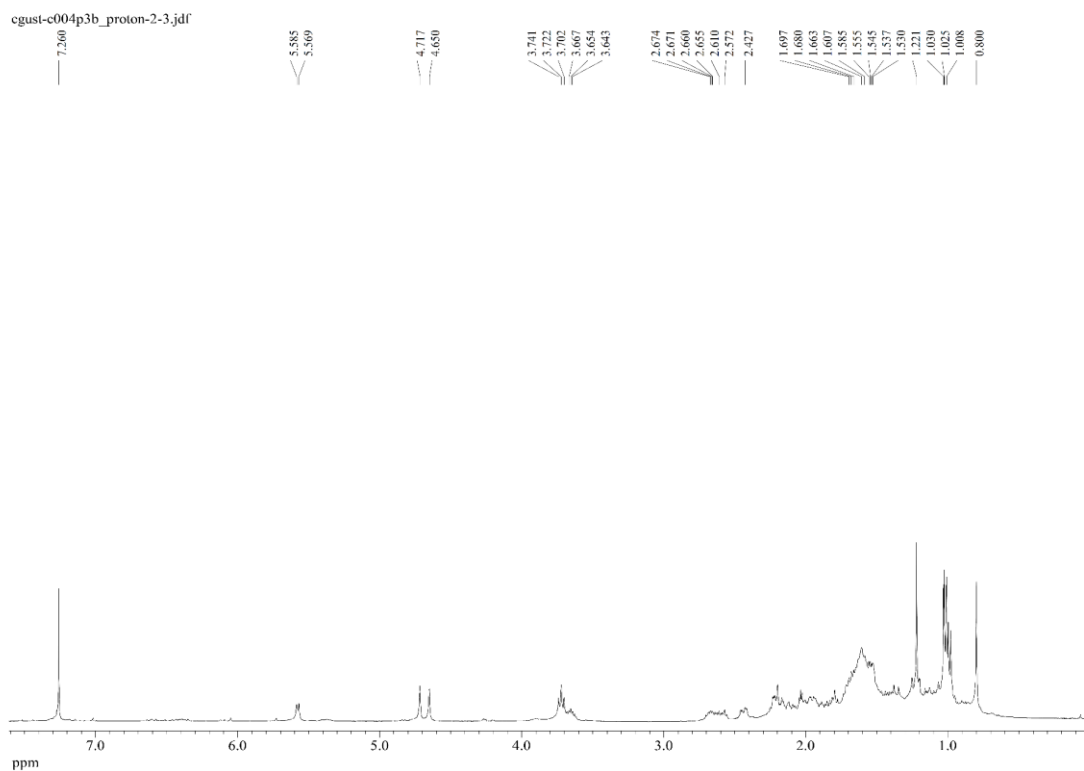

S19.  $^1\text{H}$  NMR spectrum (400 MHz) of compound **3** in  $\text{CDCl}_3$

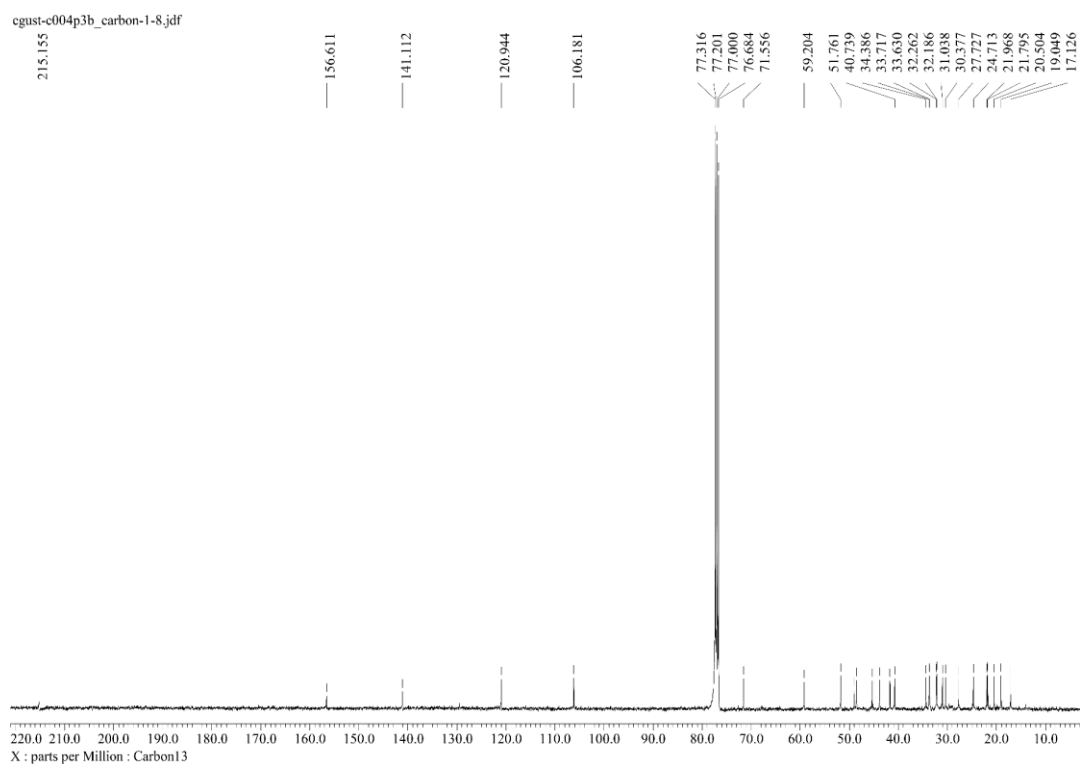

S20.  $^{13}\text{C}$  NMR spectrum (100 MHz) of compound **3** in  $\text{CDCl}_3$

CGUST-C004P3

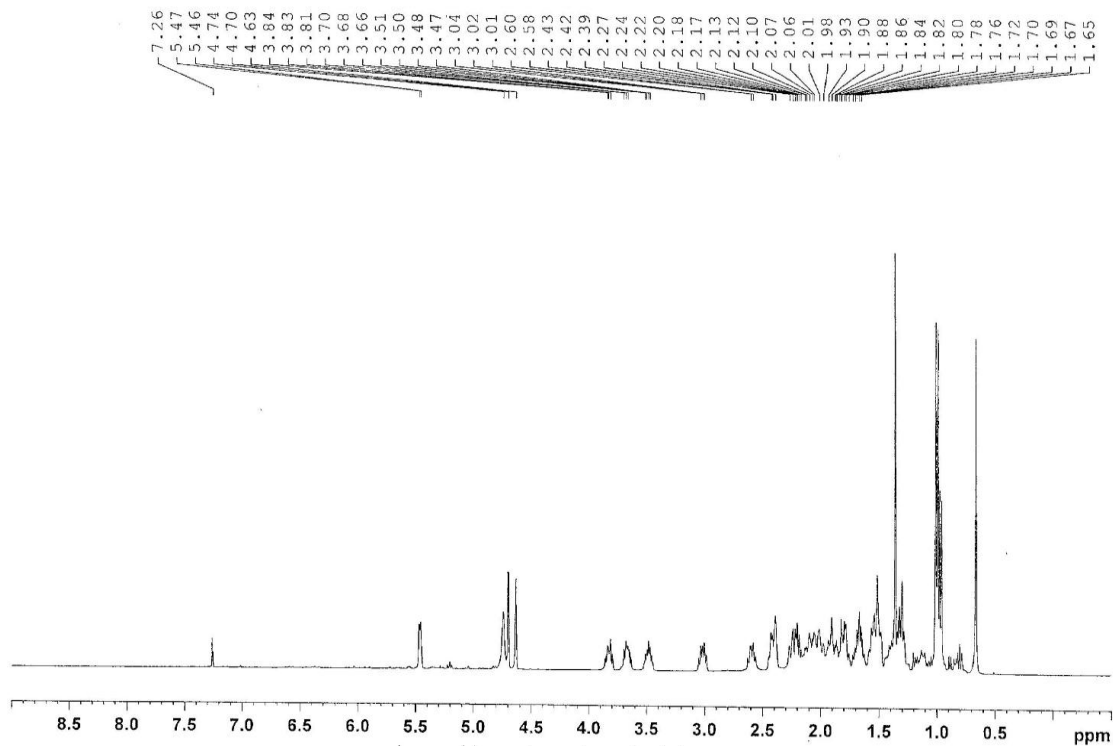

S21. <sup>1</sup>H NMR spectrum (400 MHz) of compound **4** in CDCl<sub>3</sub>

CGUST-C004P3-C13

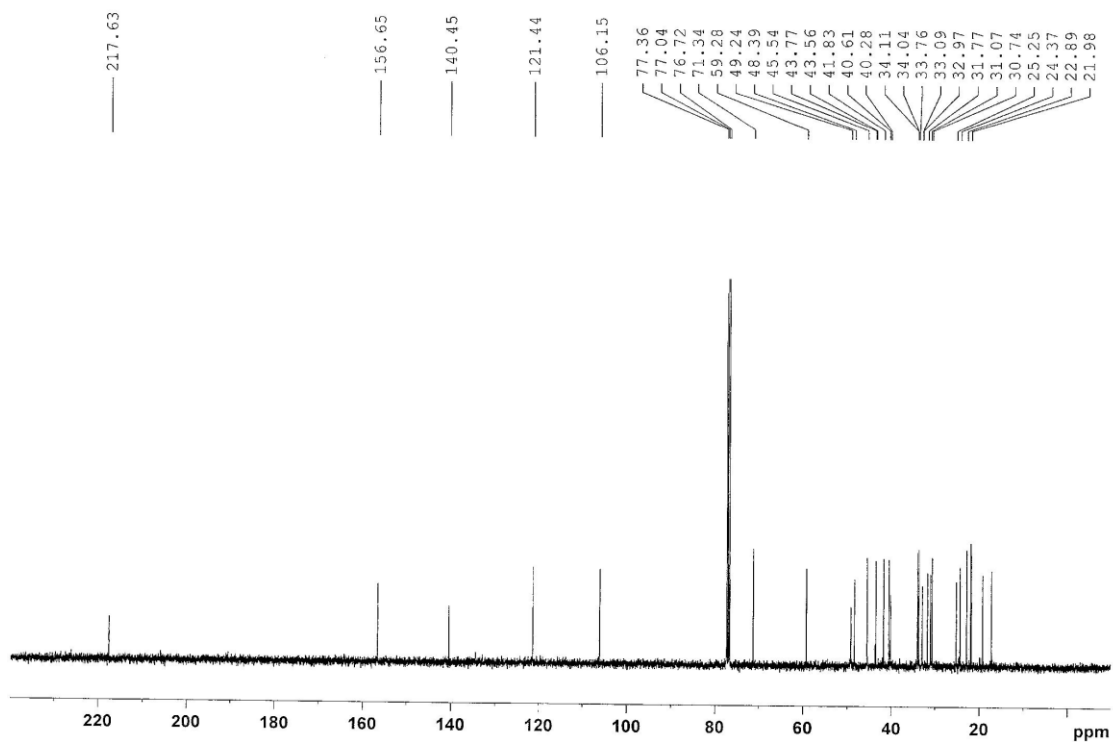

S22. <sup>13</sup>C NMR spectrum (100 MHz) of compound **4** in CDCl<sub>3</sub>
